# Supplementary material for: Virulence Mechanisms of Common Uropathogens and Their Intracellular Localisation within Urothelial Cells
Source: MDPI journal article supplement (doi:10.3390/pathogens11080926), 2022-08-17
Supplement: s1 [file s1]

## Supplementary

**Table S1.** A detailed summary of all bacterial isolates and the patients they were obtained from.

| Bacterial Species                         | Isolate Name | Site of Specimen | Susceptible                                           | Resistant                         | Patient Notes                                                                                    |
|-------------------------------------------|--------------|------------------|-------------------------------------------------------|-----------------------------------|--------------------------------------------------------------------------------------------------|
| <i>Escherichia coli</i>                   | EC1          | MSU              | AMI, AMC, CEP, COT, CTX, CLX, GEN, IMI, NFT, NOR, TMP | AMX, SFZ                          | 90 y/o; TKR; uterine prolapse.                                                                   |
| <i>Escherichia coli</i>                   | EC2          | MSU              | AMI, AMC, CEP, COT, CTX, CLX, GEN, IMI, NFT, NOR      | TMP, SFZ                          | 78 y/o; febrile; bone marrow biopsy; previous UTI history.                                       |
| <i>Escherichia coli</i>                   | EC3          | MSU              | AMI, CEP, COT, CTX, CLX, IMI, NFT                     | AMX, AMC, AMP, GEN, NOR, SFZ, TMP | 52 y/o; renal transplant recipient with IgA nephropathy.                                         |
| <i>Enterococcus faecalis</i>              | EF1          | MSU              | AMX, AMP, DOX, NFT, VAN                               | TTC                               | 94 y/o; had neck of femur fixed with IDC inserted 2 weeks prior to MSU.                          |
| <i>Enterococcus faecalis</i>              | EF2          | IDC              | AMX, AMP, DOX, NFT, VAN                               | TTC                               | 61 y/o; mesh repair for recurrent ventral hernia 5 days prior to IDC specimen; symptomatic UTI.  |
| <i>Enterococcus faecalis</i>              | EF3          | SPC              | AMX, AMP, DOX, NFT, VAN                               | No resistances recorded           | 66 y/o; symptomatic UTI; post-op SPC in situ for 8 days; had DO.                                 |
| <b>Streptococcus sp., Group B</b>         | GBS1         | MSU              | AMX, AMP, NFT, PEN, VAN                               | DOX, TTC                          | 82 y/o; severe arthritis; recurrent UTI.                                                         |
| <b>Streptococcus sp., Group B</b>         | GBS2         | MSU              | AMX, AMP, DOX, NFT, VAN                               | TTC                               | 64 y/o; renal transplant recipient.                                                              |
| <b>Streptococcus agalactiae (Group B)</b> | GBS3         | MSU              | AMX, AMP, DOX, NFT, PEN, TTC, VAN                     | No resistances recorded           | 29 y/o; history of UTIs; urinary urge and stress incontinence; painful bladder; symptomatic UTI. |

Antibiotics: AMI, Amikacin; AMX, Amoxicillin; AMC, Amoxicillin and Clavulanic acid; AMP, Ampicillin; CEP, Cefepime; COT, Cefotaxime; CTX, Ceftriaxone; CLX, Cephalexin; DOX, Doxycycline; GEN, Gentamycin; IMI, Imipenem; NFT, Nitrofurantoin; NOR, Norfloxacin; SFZ, Sulfafurazole; TTC, Tetracycline; TMP, Trimethoprim; VAN, Vancomycin. DO, detrusor overactivity; IDC, indwelling catheter; MSU, mid-stream urine; post-op, post-operation; SPC, suprapubic catheter; TKR, total knee replacement; UTI, urinary tract infection.
